# Supplementary material for: Differential Gene Expression in Response to Papaya ringspot virus Infection in Cucumis metuliferus Using cDNA- Amplified Fragment Length Polymorphism Analysis
Source: PubMed Central journal article supplement (PMC3706314; doi:10.1371/journal.pone.0068749), 2013-07-09
Supplement: pone.0068749.s002.pdf [file pone.0068749.s002.pdf]

**Table S1.** The putative functions (as determined by BLAST in GenBank) of the other transcript derived fragments (TDFs) responsive to the resistance of *C. metuliferus* infected with PRSV

| <b>TDF</b> | <b>Size (bp)</b> | <b>I/C<sup>a</sup></b> | <b>Accession number</b> | <b>Functional annotation</b>                                                | <b>BLAST E-value</b> | <b>Restriction site<sup>b</sup></b> |
|------------|------------------|------------------------|-------------------------|-----------------------------------------------------------------------------|----------------------|-------------------------------------|
| ku2005-11  | 291              | I                      | BAD87519                | putative Golgi autoantigen                                                  | 2E-10                | M+M                                 |
| ku2005-22  | 565              | I                      | NP565018                | oxidoreductase                                                              | 4E-48                | M+M                                 |
| ku2005-30  | 676              | I                      | AAF34799                | 40S ribosomal protein S16                                                   | 2E-66                | M+M                                 |
| ku2005-41  | 760              | I                      | BAA13541                | CPRD12 protein                                                              | 6E-75                | M+M                                 |
| ku2005-56  | 204              | I                      | AAA32857                | receptor-like protein kinase                                                | 6E-5                 | E+M                                 |
| ku2005-63  | 623              | I                      | AAM62640                | Function unknown protein                                                    | 4E-22                | M+M                                 |
| ku2005-81  | 393              | C                      | NP567449                | acid phosphatase                                                            | 3E-16                | M+M                                 |
| ku2005-100 | 534              | C                      | ABA40465                | ribosomal protein S27-like protein                                          | 5E-32                | M+M                                 |
| ku2005-118 | 656              | I                      | AAS46243                | xyloglucan endotransglucosylase<br>-hydrolase, XTH7                         | 7E-100               | M+M                                 |
| ku2500-154 | 156              | C                      | CAD31840                | alpha-dioxygenase                                                           | 1E-6                 | E+M                                 |
| ku2005-170 | 240              | No                     | CAA48140                | ubiquitin                                                                   | 4E-20                | E+M                                 |
| ku2005-175 | 461              | I                      | NP197655                | prephenate dehydratase                                                      | 9E-16                | M+M                                 |
| ku2005-180 | 404              | I                      | BAB33421                | putative senescence-associated protein                                      | 2E-39                | E+M                                 |
| ku2005-181 | 619              | I                      | AAB37746                | expansin S1 precursor                                                       | 7E-106               | M+M                                 |
| ku2005-232 | 522              | C                      | NP197857                | Function unknown protein                                                    | 2E-46                | M+M                                 |
| ku2005-238 | 793              | I                      | NP194345                | transcription factor                                                        | 6E-12                | M+M                                 |
| ku2005-243 | 468              | C                      | NP178175                | acetylornithine transaminase/ pyridoxal<br>phosphate binding / transaminase | 8E-31                | M+M                                 |
| ku2005-250 | 181              | C                      | MU57845                 | disease resistance-responsive<br>protein-related                            | 9E-68                | E+M                                 |
| ku2005-267 | 116              | I                      | NP850181                | structural constituent of ribosome                                          | 8E-4                 | E+M                                 |
| ku2005-272 | 148              | I                      | MU62607                 | Function unknown protein                                                    | 7E-31                | E+M                                 |
| ku2005-292 | 154              | I                      | AAL25650                | calcineurin-like protein                                                    | 2E-19                | E+M                                 |
| ku2005-297 | 774              | I                      | NP568239                | UBP22 (UBIQUITIN-SPECIFIC<br>PROTEASE 22)                                   | 1E-84                | M+M                                 |
| ku2005-314 | 284              | C                      | AAT77309                | Function unknown protein                                                    | 3E-21                | E+M                                 |
| ku2005-321 | 127              | C                      | NP200894                | GTP-binding protein                                                         | 9E-14                | E+M                                 |
| ku2005-336 | 318              | C                      | NP197501                | small GTP-binding nuclear protein;<br>Ran-1                                 | 1E-17                | M+M                                 |
| ku2005-340 | 131              | C                      | MU60193                 | ubiquitin-protein ligase                                                    | 6E-65                | E+M                                 |
| ku2005-345 | 145              | C                      | MU52543                 | Function unknown protein                                                    | 8E-56                | E+M                                 |
| ku2005-350 | 412              | C                      | XP482452                | Putative protein kinase                                                     | 4E-7                 | M+M                                 |
| ku2005-363 | 265              | I                      | NP193740                | metallopeptidase                                                            | 1E-17                | E+M                                 |
| ku2005-365 | 292              | C                      | AAT77309                | Function unknown protein                                                    | 3E-23                | E+M                                 |
| ku2005-385 | 340              | I                      | NP174119                | carboxy-lyase                                                               | 1E-28                | E+M                                 |
| ku2005-394 | 386              | I                      | AAO24554                | Function unknown protein                                                    | 5E-38                | M+M                                 |
| ku2005-399 | 409              | I                      | NP921921                | Putative protein kinase                                                     | 3E-17                | M+M                                 |

**Table S1.** The putative functions (as determined by BLAST in GenBank) of the other transcript derived fragments (TDFs) responsive to the resistance of *C. metuliferus* infected with PRSV (continued)

| <b>TDF</b> | <b>Size (bp)</b> | <b>I/C<sup>a</sup></b> | <b>Accession number</b> | <b>Functional annotation</b>                             | <b>BLAST E-value</b> | <b>Restriction site<sup>b</sup></b> |
|------------|------------------|------------------------|-------------------------|----------------------------------------------------------|----------------------|-------------------------------------|
| ku2005-409 | 735              | I                      | MU54137                 | transferase                                              | 1E-150               | M+M                                 |
| ku2005-418 | 207              | C                      | AAK93736                | putative cysteinyl-tRNA synthetase                       | 1E-12                | M+M                                 |
| ku2005-423 | 181              | I                      | MU54308                 | 60S ribosomal protein L13A (RPL13aD)                     | 9E-28                | E+M                                 |
| ku2005-432 | 511              | I                      | NP001030956             | RPS15 (RIBOSOMAL PROTEIN S15)                            | 2E-39                | M+M                                 |
| ku2005-440 | 207              | I                      | 1710320A                | Photosystem I 20 kD protein                              | 1E-22                | E+M                                 |
| ku2005-445 | 651              | I                      | CAB72464                | protein-tyrosine-phosphatase-like protein                | 2E-46                | M+M                                 |
| ku2005-449 | 592              | I                      | XP450905                | putative annexin                                         | 4E-63                | M+M                                 |
| ku2005-457 | 189              | C                      | NP179688                | Function unknown protein                                 | 5E-10                | E+M                                 |
| ku2005-462 | 659              | C                      | BAD95352                | bZIP-like protein                                        | 2E-20                | M+M                                 |
| ku2005-481 | 735              | C                      | NP195540                | transferase, transferring glycosyl groups                | 1E-32                | M+M                                 |
| ku2005-482 | 543              | I                      | NP566542                | Function unknown protein                                 | 2E-7                 | M+M                                 |
| ku2005-483 | 349              | I                      | NP172512                | Function unknown protein                                 | 8E-39                | M+M                                 |
| ku2005-509 | 181              | I                      | MU44891                 | CA1 (CARBONIC ANHYDRASE 1)                               | 2E-72                | E+M                                 |
| ku2005-510 | 114              | C                      | MU53888                 | carbonate dehydratase                                    | 4E-32                | E+M                                 |
| ku2005-512 | 228              | I                      | MU43461                 | NtEIG-A1                                                 | 7E-23                | E+M                                 |
| ku2005-515 | 176              | I                      | MU62474                 | Function unknown protein                                 | 2E-16                | E+M                                 |
| ku2005-517 | 109              | I                      | MU47871                 | bundle-sheath defective protein 2 family/bsd2 family     | 2E-36                | E+M                                 |
| ku2005-524 | 300              | C                      | MU51610                 | Function unknown protein                                 | 1E-112               | M+M                                 |
| ku2005-529 | 480              | I                      | NP918587                | putative 33kDa oxygen evolving protein of photosystem II | 4E-27                | M+M                                 |
| ku2005-544 | 224              | I                      | P08474                  | Ribulose biphosphate carboxylase small chain (RuBiSco)   | 2E-20                | E+M                                 |
| ku2005-554 | 11109            | I                      | AAM73656                | AER, auxin and ethylene cross-talk marker                | 1E-13                | M+M                                 |
| ku2005-561 | 872              | C                      | AAD11808                | syntaxin-related protein Nt-syr1                         | 3E-57                | M+M                                 |
| ku2005-567 | 200              | C                      | MU47813                 | ATBI1 (BAX INHIBITOR 1)                                  | 2E-75                | E+M                                 |
| ku2005-570 | 636              | I                      | CAD87534                | putative xyloglucan endotransglycosylase                 | 2E-102               | M+M                                 |
| ku2005-571 | 1165             | C                      | MU60959                 | AER                                                      | 0                    | M+M                                 |
| ku2005-573 | 991              | C                      | NP196696                | catalytic                                                | 9E-41                | M+M                                 |
| ku2005-574 | 677              | C                      | NP177209                | Kinase                                                   | 3E-101               | M+M                                 |
| ku2005-577 | 863              | C                      | MU43308                 | syntaxin-related protein Nt-syr1                         | 0                    | M+M                                 |
| ku2005-582 | 527              | I                      | MU47524                 | thioredoxin h                                            | 0                    | M+M                                 |
| ku2005-591 | 585              | I                      | CAB61890                | acetohydroxy acid isomeroeductase                        | 8E-96                | M+M                                 |

**Table S1.** The putative functions (as determined by BLAST in GenBank) of the other transcript derived fragments (TDFs) responsive to the resistance of *C. metuliferus* infected with PRSV (continued)

| <b>TDF</b> | <b>Size (bp)</b> | <b>I/C<sup>a</sup></b> | <b>Accession number</b> | <b>Functional annotation</b>    | <b>BLAST E-value</b> | <b>Restriction site<sup>c</sup></b> |
|------------|------------------|------------------------|-------------------------|---------------------------------|----------------------|-------------------------------------|
| ku2005-17  | 99               | C                      |                         | No significant similarity match |                      | E+M                                 |
| ku2005-27  | 130              | I                      |                         | No significant similarity match |                      | E+M                                 |
| ku2005-46  | 487              | C                      |                         | No significant similarity match |                      | M+M                                 |
| ku2005-51  | 386              | I                      |                         | No significant similarity match |                      | M+M                                 |
| ku2005-59  | 109              | C                      |                         | No significant similarity match |                      | E+M                                 |
| ku2005-86  | 483              | C                      |                         | No significant similarity match |                      | M+M                                 |
| ku2005-91  | 384              | I                      |                         | No significant similarity match |                      | M+M                                 |
| ku2005-105 | 172              | I                      |                         | No significant similarity match |                      | E+M                                 |
| ku2005-123 | 346              | ND                     |                         | No significant similarity match |                      | M+M                                 |
| ku2005-128 | 249              | I                      |                         | No significant similarity match |                      | E+M                                 |
| ku2005-137 | 251              | C                      |                         | No significant similarity match |                      | E+M                                 |
| ku2005-141 | 342              | I                      |                         | No significant similarity match |                      | E+M                                 |
| ku2005-149 | 136              | C                      |                         | No significant similarity match |                      | E+M                                 |
| ku2005-189 | 448              | C                      |                         | No significant similarity match |                      | M+M                                 |
| ku2005-227 | 479              | C                      |                         | No significant similarity match |                      | M+M                                 |
| ku2005-252 | 133              | I                      |                         | No significant similarity match |                      | E+M                                 |
| ku2005-262 | 111              | I                      |                         | No significant similarity match |                      | E+M                                 |
| ku2005-317 | 170              | I                      |                         | No significant similarity match |                      | E+M                                 |
| ku2005-380 | 430              | I                      |                         | No significant similarity match |                      | M+M                                 |
| ku2005-404 | 196              | I                      |                         | No significant similarity match |                      | E+M                                 |
| ku2005-417 | 303              | C                      |                         | No significant similarity match |                      | E+M                                 |
| ku2005-427 | 722              | I                      |                         | No significant similarity match |                      | M+M                                 |
| ku2005-435 | 678              | C                      |                         | No significant similarity match |                      | M+M                                 |
| ku2005-500 | 439              | C                      |                         | No significant similarity match |                      | M+M                                 |
| ku2005-519 | 93               | C                      |                         | No significant similarity match |                      | E+M                                 |

<sup>a</sup> The transcription of TDFs is induced by virus infection (I) or constitutive (C) in *C. metuliferus*.

ND means non-detectable.

<sup>b</sup> The TDFs contain either restriction enzyme site of *EcoR* I or *Mse* I at the both ends.
